# Supplementary material for: Emulating Ebbinghaus forgetting behavior in a neuromorphic device based on 1D supramolecular nanofibres
Source: Royal Society of Chemistry journal article supplement (doi:10.1039/d3nr00195d), 2023-01-01
Supplement: d3nr00195d1.pdf [file d3nr00195d1.pdf]

## **Emulating Ebbinghaus forgetting behavior in a neuromorphic device based on 1D supramolecular nanofibres**

Tejaswini S. Rao<sup>a,†</sup>, Suman Kundu<sup>b,†</sup>, Bharath Bannur<sup>a</sup>, Subi J. George<sup>c</sup>, Giridhar U. Kulkarni<sup>a,\*</sup>

<sup>a</sup>Chemistry & Physics of Materials Unit, Jawaharlal Nehru Centre for Advanced Scientific  
Research, Jakkur P.O., Bangalore - 560064, India

<sup>b</sup>Centre for Nano and Soft Matter Sciences, Shivanapura, Bangalore - 562162, India

<sup>c</sup>Supramolecular Chemistry Laboratory, New Chemistry Unit, Jawaharlal Nehru Centre for  
Advanced Scientific Research, Bangalore - 560064, India

<sup>†</sup> Tejaswini S. Rao and Suman Kundu contributed equally to this work.

\* Email: [kulkarni@jncasr.ac.in](mailto:kulkarni@jncasr.ac.in)

## SUPPLEMENTARY FIGURES

**Table S1.** Comparison of two-terminal optoelectronic synaptic devices reported in the literature

| Material                                                              | Material dimension | Electrode terminals | Response time (ms) | Energy   | Electrical/Optical (E/O) | STP/LTP | Forgetting behavior | Synaptic functionalities                                                                  | Ref          |
|-----------------------------------------------------------------------|--------------------|---------------------|--------------------|----------|--------------------------|---------|---------------------|-------------------------------------------------------------------------------------------|--------------|
| Au/C8-BTBT/SiO <sub>2</sub> /Si                                       | 2 D                | Three               | 50                 | 13.6 pJ  | O                        | ✓       | ✓                   | PPF/learning and forgetting                                                               | 1            |
| Si/SiO <sub>2</sub> /IDTBT-PCBM/Au                                    | 3 D                | Three               | 60                 |          | E+O                      | ✓       | ✓                   | EPSC/IPSC, PPF/PPD                                                                        | 2            |
| Au/pentacene/poly methyl methacrylate (PMMA)/2DP/SiO <sub>2</sub> /Si | 2 D                | Three               | 50                 | 0.29 pJ  | O                        | ✓       | ✓                   | PPF /learning- relearning/pixel array/Classical conditioning                              | 3            |
| Carotene: Organic semiconductor                                       | Bulk               | Three               | 1000               | 3.4 aJ   | E+O                      | ✓       |                     | EPSC/PPF/ learning relearning/pixel array                                                 | 4            |
| Hydrogel/ PEDOT: PSS                                                  | Bulk               | Three               | 5                  |          | E                        | LTP     |                     | IPSC/PPF/PPD /LTD/Pixel array using additional circuit                                    | 5            |
| Au/PVDT 10-N2200 mix/silver nanowire/SiO <sub>2</sub> /Si             | Bulk               | Three               | 1000(O)<br>50 (E)  |          | E+O                      | ✓       |                     | EPSC/IPSC PPF/PPD                                                                         | 6            |
| Au/IDTBT/SiO <sub>2</sub> /Si                                         | 2D                 | Three               | 30                 | 0.416 pJ | E                        | LTP     | ✓                   | PPF/ PPD/LTD/programming ANN                                                              | 7            |
| Au/WCN/chlorophyll II – a-PDPPDT/SiO <sub>2</sub> /Si                 | 3 D                | Three               | 500                |          | E+O                      | ✗       |                     | EPSC/IPSC/PPF/PPD/ morse code/image recognition                                           | 8            |
| Au/P <sub>3</sub> HT/Glass                                            | 2D                 | Two                 | 100                |          | O                        | ✓       |                     | EPSC/learning relearning/ PPF/ Pixel array/SDDP/SNDP                                      | 9            |
| Ag/PEDOT: PSS/Ta                                                      | Bulk               | Two                 | 20                 |          | E                        | ✓       | ✓                   | STDP/SRDP/ learning relearning                                                            | 10           |
| Au/ Gold NPs/ Pentacene/SiO <sub>2</sub> /Si                          | Bulk               | Three               |                    |          | E                        | ✓       |                     |                                                                                           | 11           |
| PEDOT/PTHF OCET                                                       | Bulk               | Three               | 50                 |          | E                        | ✓       |                     | PPD                                                                                       | 12           |
| P <sub>3</sub> HT/PEO                                                 | 1 D                | Three               | 111.2/50           | 1.23 fJ  | E                        | ✓       | ✓                   | EPSC/IPSC/LTD                                                                             | 13           |
| Ion gel/P <sub>3</sub> HT                                             | Bulk               | Three               | 15                 |          | E                        | STP     |                     | PPF/self-tuning/spike logic operation/spatiotemporal dendritic integration and modulation | 14           |
| Supramolecular nanofibre                                              | 1 D                | Two                 | 100                | 1.06 pJ  | O                        | ✓       |                     | PPF/learning relearning/pixel array                                                       | Present work |

for emulating different synaptic functions

### Note S1

The power consumption of the device is calculated using the equation:  $E = V \times I \times t$

Where  $V$  is the reading voltage,  $I$  is the peak current, and  $t$  is the pulse duration.

Substituting the values for  $V = 1.2\text{ V}$ ,  $I = 11.3\text{ nA}$ , and  $t = 0.1\text{ s}$ , the power consumption of the device per unit pulse of 0.1 s is found to be  $E = 1.2 \times 11.3 \times 0.1 = 1.35\text{ nJ}$  per pulse.

The power consumption of  $1.35\text{ nJ}$  per pulse is for the whole device with several nanofibres spread across the Ti electrodes. However, each nanofibre across the Ti electrodes acts as a synaptic junction.

On average, there are 15 nanofibres spread across the electrodes in a single IDT pattern. There are 85 IDT patterns, and therefore, the whole device consists of  $85 \times 15 = 1275$  nanofibres.

Therefore, the power consumption per synaptic junction is given by;

$$1.35\text{ nJ}/1275 = 1.06\text{ pJ}.$$

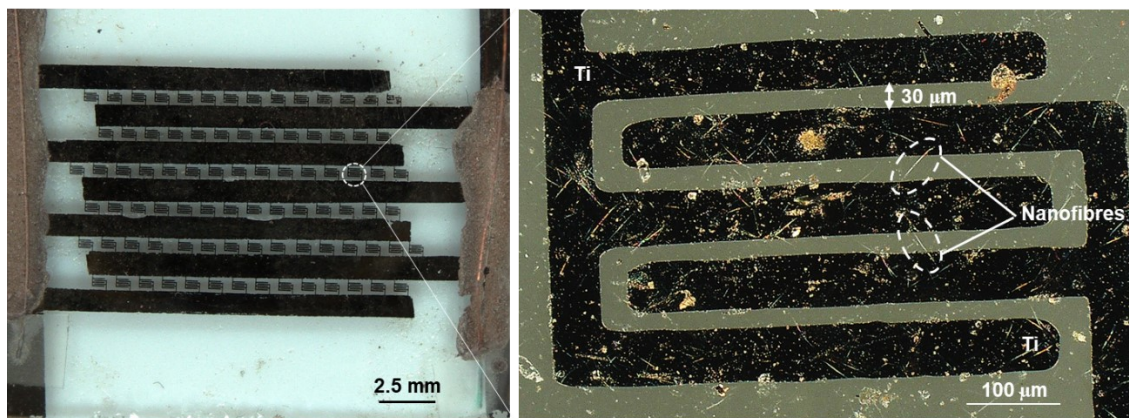

**Fig. S1** Optical microscopy image of the complete device is shown on the left. The magnified image of a single unit of interdigitated (IDT) pattern is shown on the right with the nanofibres spread across the Ti electrodes.

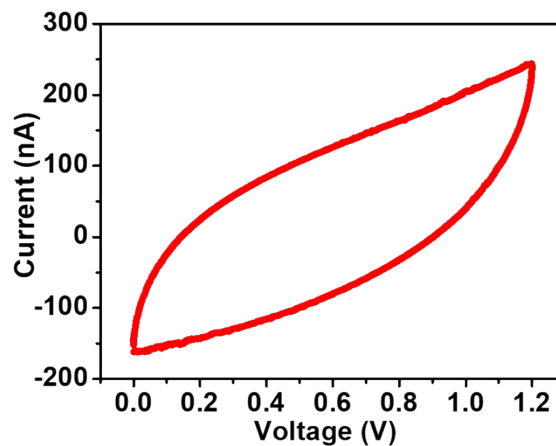

**Fig. S2** IV sweep of the device (in dark) from 0 to 1.2 V, showing a capacitive behavior of the device. This aspect has been studied earlier<sup>15</sup>.

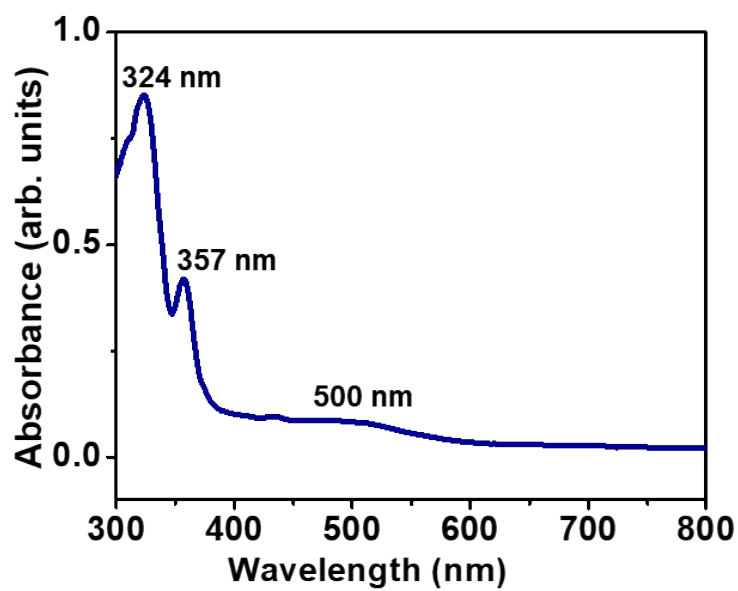

**Fig. S3** UV-visible absorption spectrum of the supramolecular nanofibre thin film.

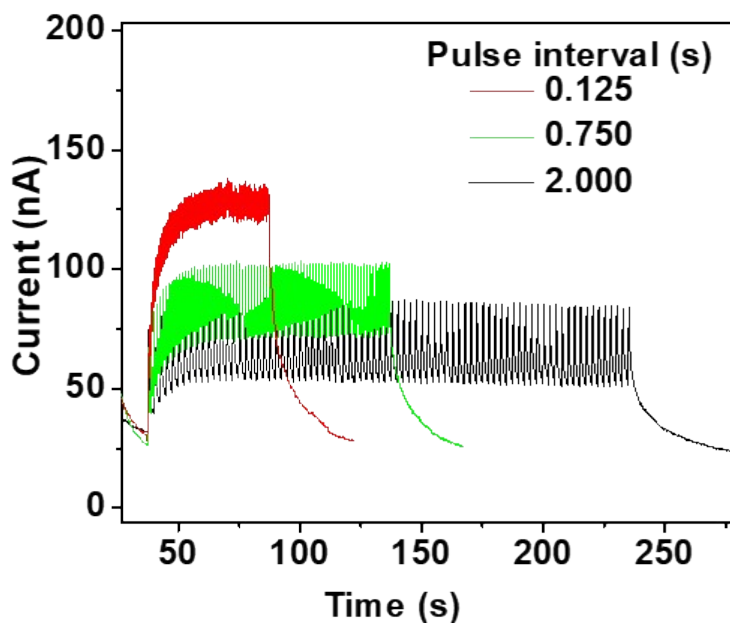

**Fig. S4** Current response of the device for 80 UV light pulses with varying pulse intervals.

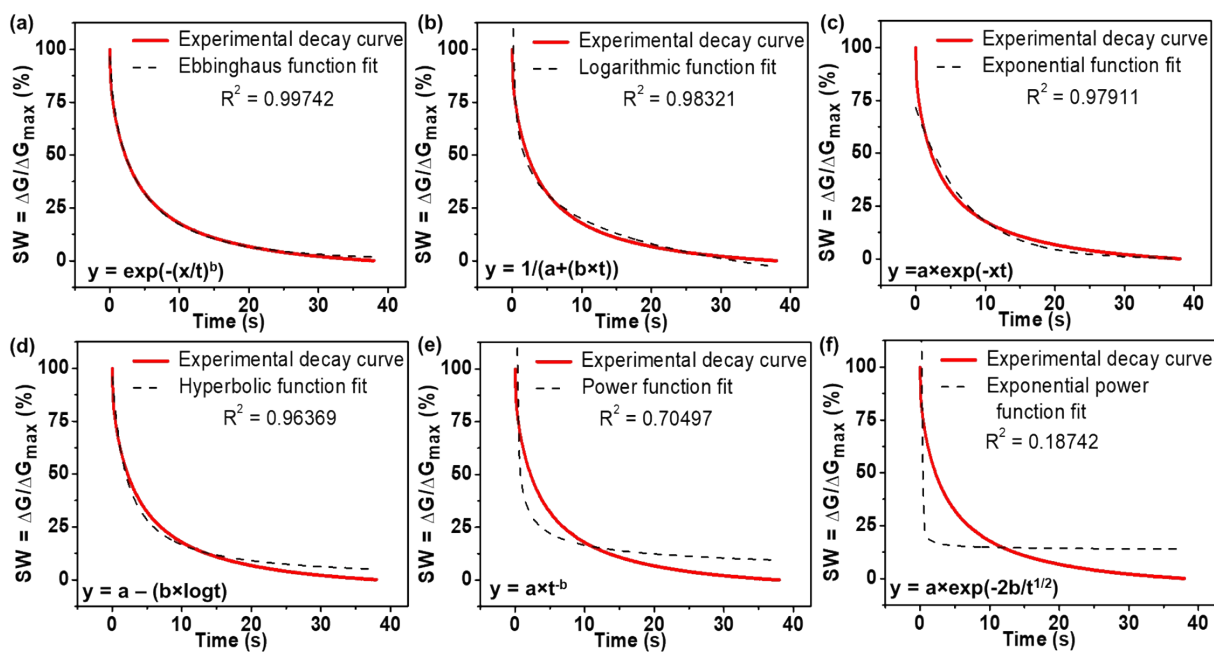

**Fig. S5** The decay curve after application of 80 pulses with 0.125 s pulse interval fitted with the (a) Ebbinghaus (b) logarithmic (c) exponential (d) hyperbolic (e) power (f) exponential power functions with Ebbinghaus function being the best fit.

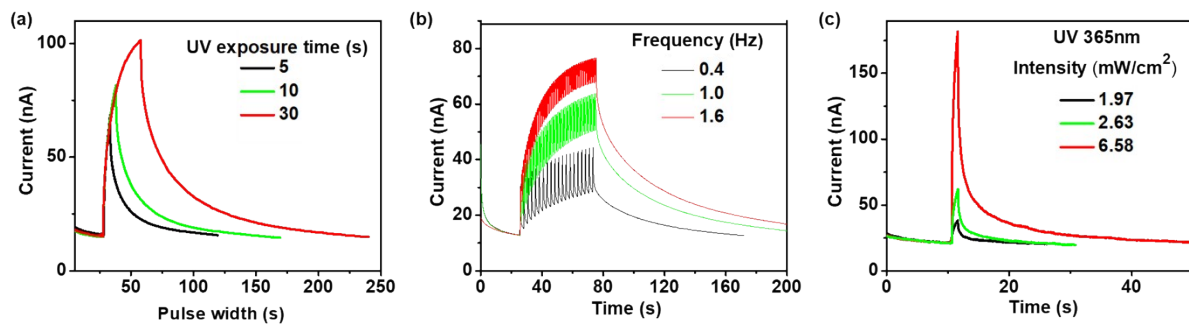

**Fig. S6** Current response of the device for different UV exposure (a) times. (b) frequencies. (c) intensities.

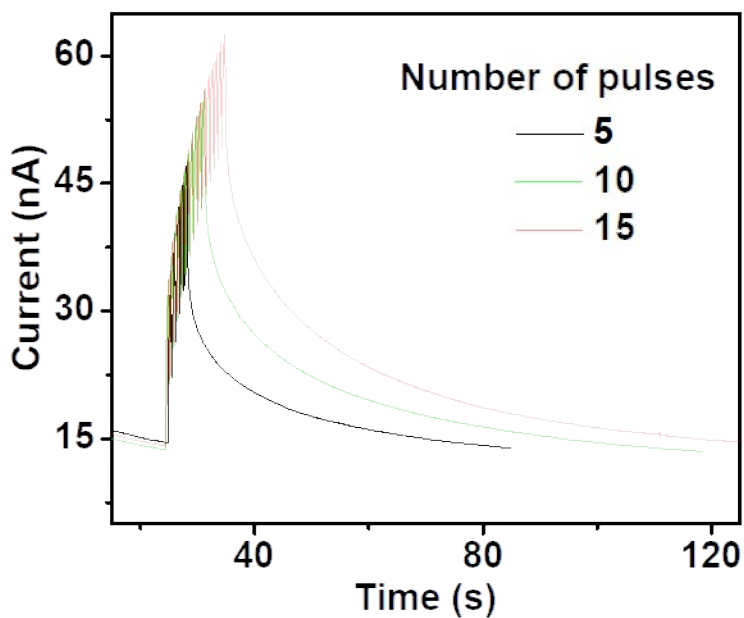

**Fig. S7** Current response of the device for varying numbers of pulses.

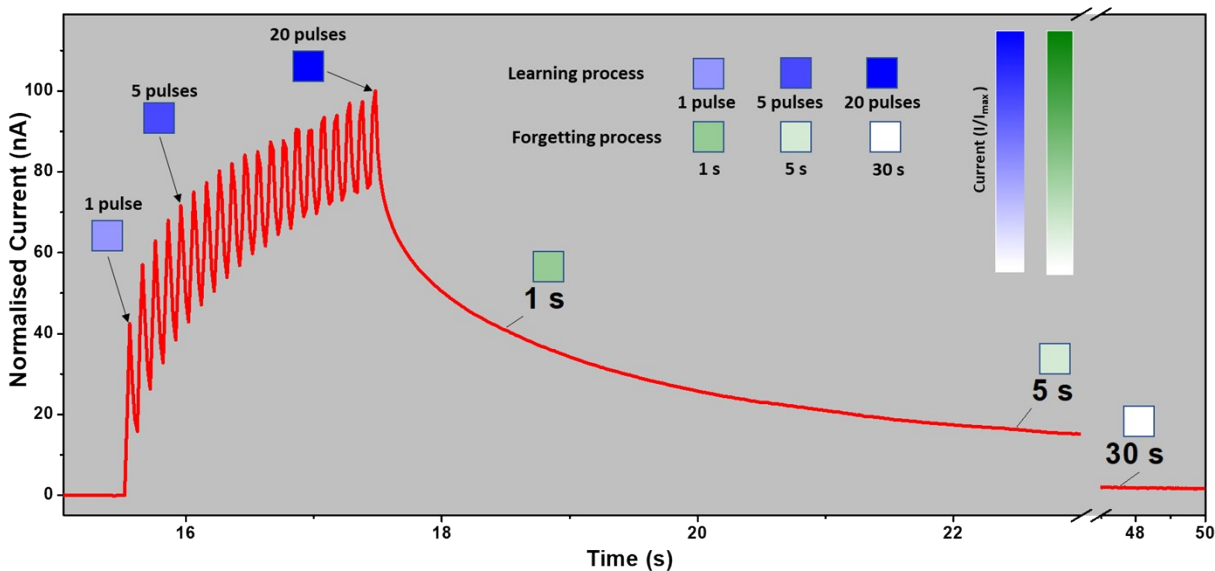

**Fig. S8** Current response and decay behavior of a single pixel from a 3x3 pixel array for the application of 20 UV light pulses.

#### References:

- 1 C. Yang, J. Qian, S. Jiang, H. Wang, Q. Wang, Q. Wan, P. K. L. Chan, Y. Shi and Y. Li, *Adv. Opt. Mater.*, 2020, **8**, 2000153.
- 2 S. Lan, J. Zhong, J. Chen, W. He, L. He, R. Yu, G. Chen and H. Chen, *J. Mater. Chem. C*, 2021, **9**, 3412.
- 3 J. Zhang, Q. Shi, R. Wang, X. Zhang and L. Li, *InfoMat*, 2021, **3**, 904.
- 4 B. Yang, Y. Wang, Z. Hua, J. Zhang, L. Li, D. Hao, P. Guo, L. Xiong and J. Huang, *Chem. Commun.*, 2021, **57**, 8300.
- 5 S. Han, S. Yu, S. Hu, H. J. Chen, J. Wu and C. Liu, *J. Mater. Chem. C*, 2021, **9**, 11801.
- 6 C. Gao, H. Yang, E. Li, Y. Yan, L. He, H. Chen, Z. Lin and T. Guo, *ACS Photonics*, 2021, **8**, 3094.

- 7 Q. Yang, H. Yang, D. Lv, R. Yu, E. Li, L. He, Q. Chen, H. Chen and T. Guo, *ACS Appl. Mater. Interfaces*, 2021, **13**, 8672.
- 8 J. Zhang, D. Liu, Q. Shi, B. Yang, P. Guo, L. Fang, S. Dai, L. Xiong and J. Huang, *npj Flex. Electron.*, 2022, **6**, 30.
- 9 P. Zhao, R. Ji, J. Lao, W. Xu, C. Jiang, C. Luo, H. Lin, H. Peng and C. G. Duan, *Org. Electron.*, 2022, **100**, 106390.
- 10 S. Li, F. Zeng, C. Chen, H. Liu, G. Tang, S. Gao, C. Song, Y. Lin, F. Pan and D. Guo, *J. Mater. Chem. C*, 2013, **1**, 5292.
- 11 F. Alibart, S. Pieutin, D. Guérin, C. Novembre, S. Lenfant, K. Lmimouni, C. Gamrat and D. Vuillaume, *Adv. Funct. Mater.*, 2010, **20**, 330.
- 12 P. Gkoupidenis, N. Schaefer, X. Strakosas, J. A. Fairfield and G. G. Malliaras, *Appl. Phys. Lett.*, 2010, **20**, 330.
- 13 W. Xu, S. Y. Min, H. Hwang and T. W. Lee, *Sci. Adv.*, 2016, **2**, e1501326.
- 14 C. Qian, J. Sun, L. Kong, G. Gou, J. Yang, J. He, Y. Gao and Q. Wan, *ACS Appl. Mater. Interfaces*, 2016, **8**, 26169.
- 15 S. Kundu, U. Mogera, S. J. George and G. U. Kulkarni, *Nano Energy*, 2019, **61**, 259.
